# Supplementary material for: Double NPY motifs at the N-terminus of the yeast t-SNARE Sso2 synergistically bind Sec3 to promote membrane fusion
Source: eLife journal article supplement (doi:10.7554/elife.82041), 2022-08-18
Supplement: supp [file elife-82041-supp-v1.zip]

Archive with 10 entries (10 files):
- elife_poa_e82041_Figure_1_figure_supplement_1.pdf
- elife_poa_e82041_Figure_2_figure_supplement_1.pdf
- elife_poa_e82041_Figure_2_figure_supplement_2.pdf
- elife_poa_e82041_Figure_4_figure_supplement_1.pdf
- elife_poa_e82041_Figure_8_figure_supplement_1.pdf
- elife_poa_e82041_Figure_8_figure_supplement_2.pdf
- elife_poa_e82041_Figure_9_figure_supplement_1.pdf
- elife_poa_e82041_Source_data_1.zip
- elife_poa_e82041_Supplementary_file_1.docx
- elife_poa_e82041_Supplementary_file_2.docx
