# Supplementary material for: Double NPY motifs at the N-terminus of the yeast t-SNARE Sso2 synergistically bind Sec3 to promote membrane fusion
Source: eLife journal article supplement (doi:10.7554/elife.82041), 2022-08-18

Figure 4-figure supplement 1

**A** Sequences of Sso2 and sso2 mutants (M1-M5):

|      | 1 | 2 | 3 | 4 | 5        | 6        | 7        | 8        | 9 | 10 | 11 | 12 | 13 | 14 | 15 | 16 |
|------|---|---|---|---|----------|----------|----------|----------|---|----|----|----|----|----|----|----|
| SSO2 | M | S | N | A | N        | P        | Y        | E        | N | N  | N  | P  | Y  | A  | E  | N  |
| M1   | M | S | N | A | N        | P        | Y        | <b>A</b> | N | N  | N  | P  | Y  | A  | E  | N  |
| M2   | M | S | N | A | N        | P        | <b>A</b> | E        | N | N  | N  | P  | Y  | A  | E  | N  |
| M3   | M | S | N | A | <b>A</b> | <b>A</b> | Y        | E        | N | N  | N  | P  | Y  | A  | E  | N  |
| M4   | M | S | N | A | <b>A</b> | <b>A</b> | <b>A</b> | E        | N | N  | N  | P  | Y  | A  | E  | N  |
| M5   | M | S | N | A | <b>A</b> | <b>A</b> | <b>A</b> | <b>A</b> | N | N  | N  | P  | Y  | A  | E  | N  |

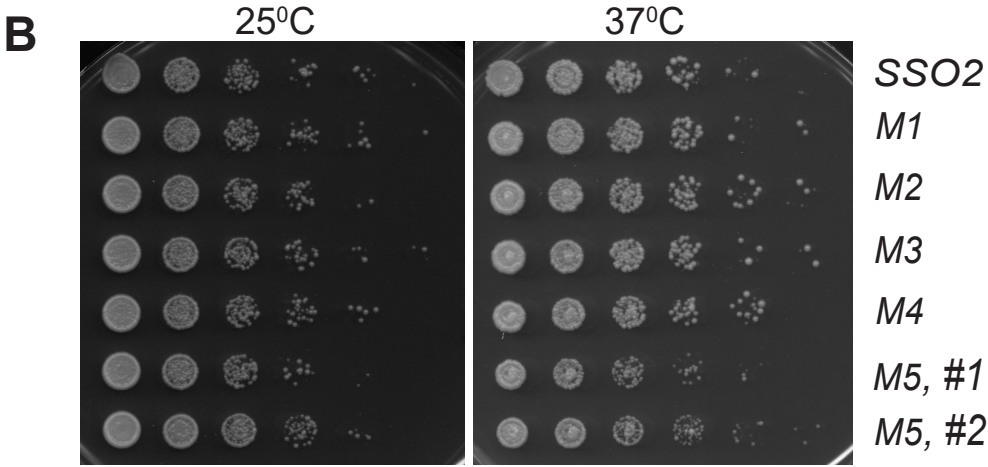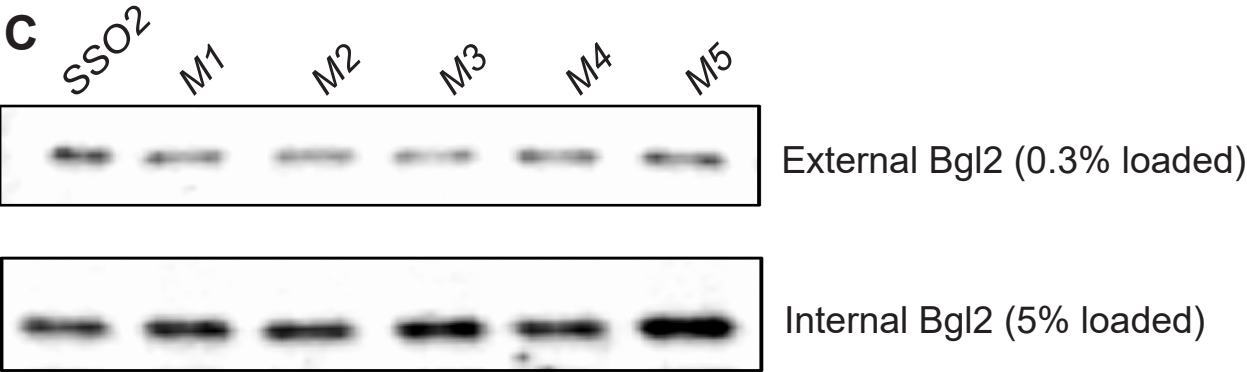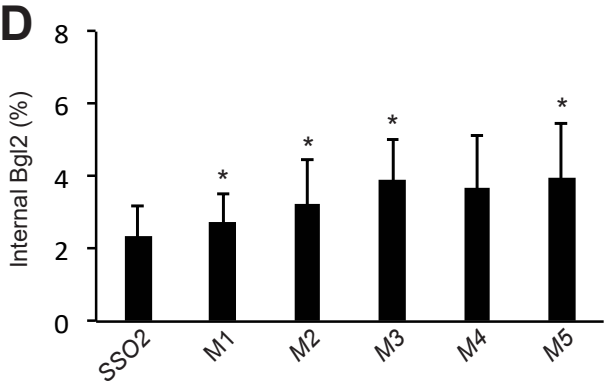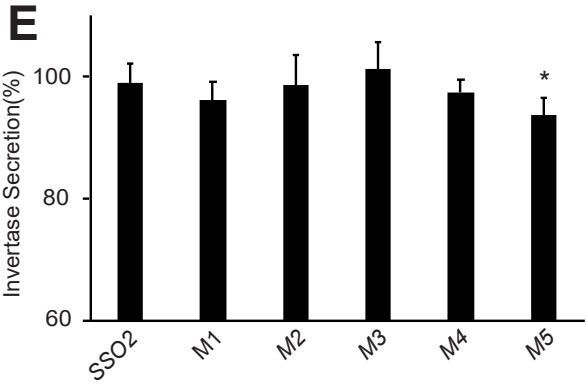

Supplement: supp [file elife-82041-supp-v1.zip › elife_poa_e82041_Figure_4_figure_supplement_1.pdf]
