# Supplementary figures and images for: Double NPY motifs at the N-terminus of the yeast t-SNARE Sso2 synergistically bind Sec3 to promote membrane fusion
Source: eLife journal article supplement (doi:10.7554/elife.82041), 2022-08-18

Figure 1-figure supplement 1

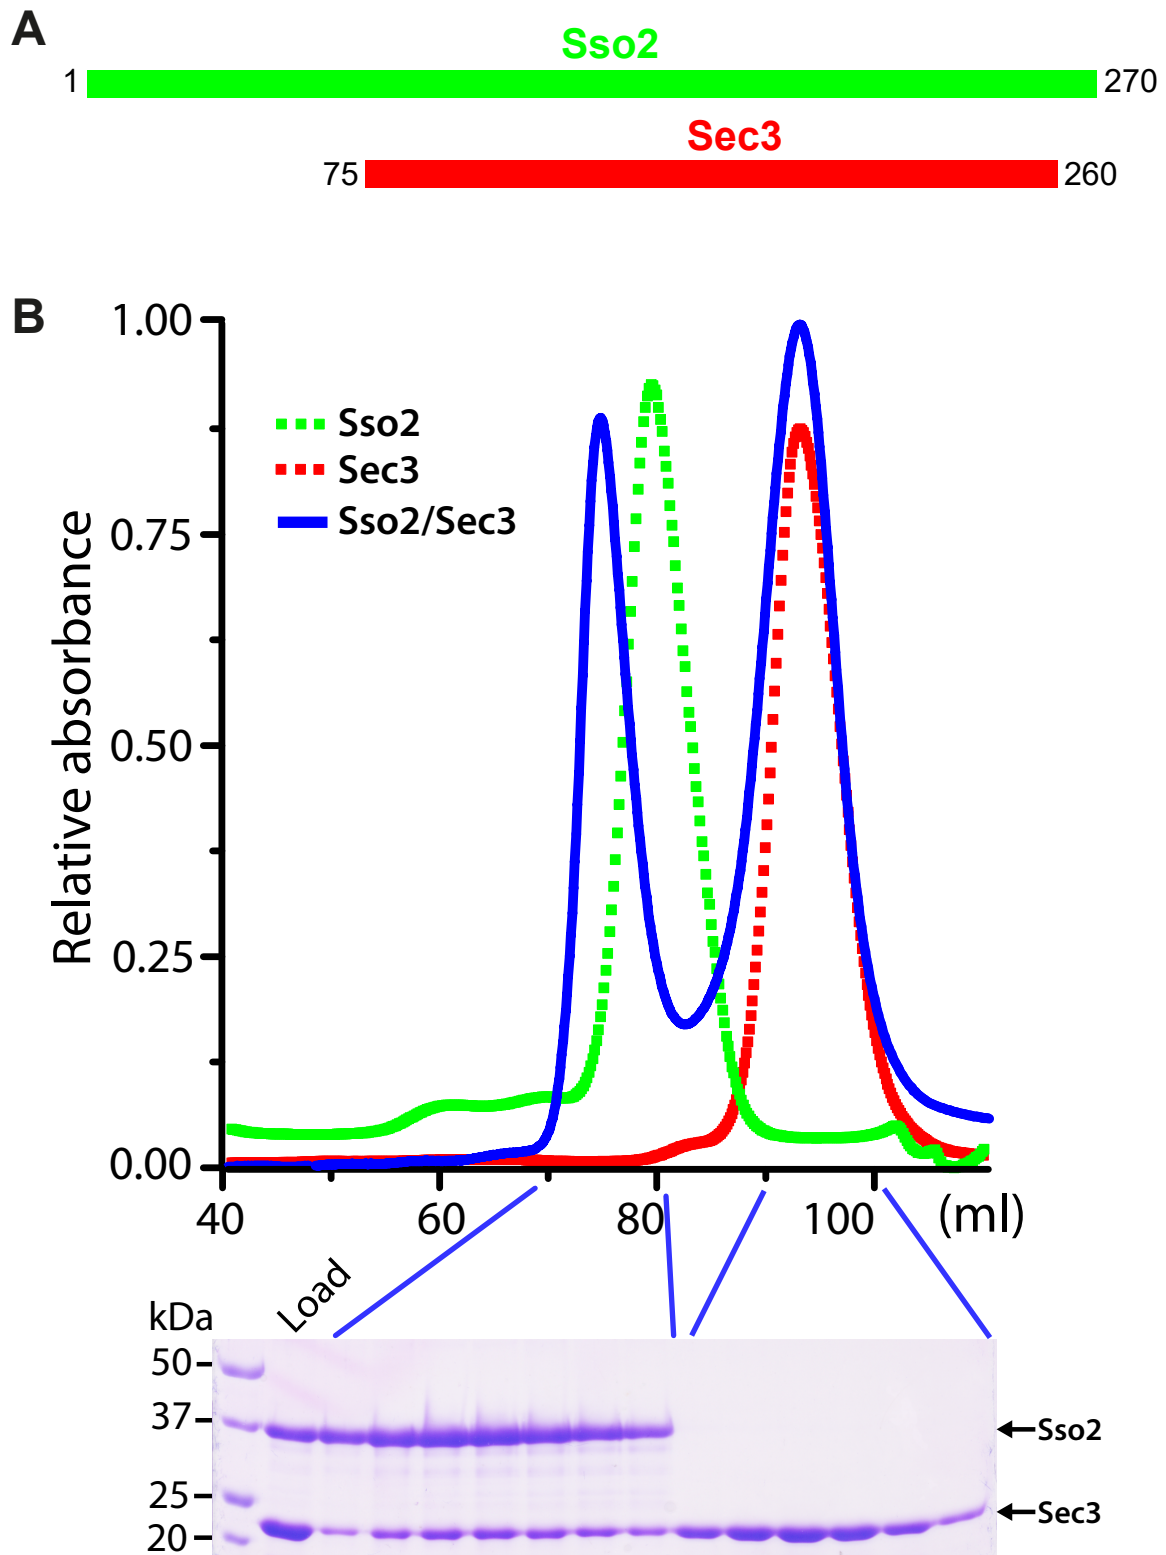

Supplement: supp [file elife-82041-supp-v1.zip › elife_poa_e82041_Figure_1_figure_supplement_1.pdf]

Figure 2-figure supplement 1

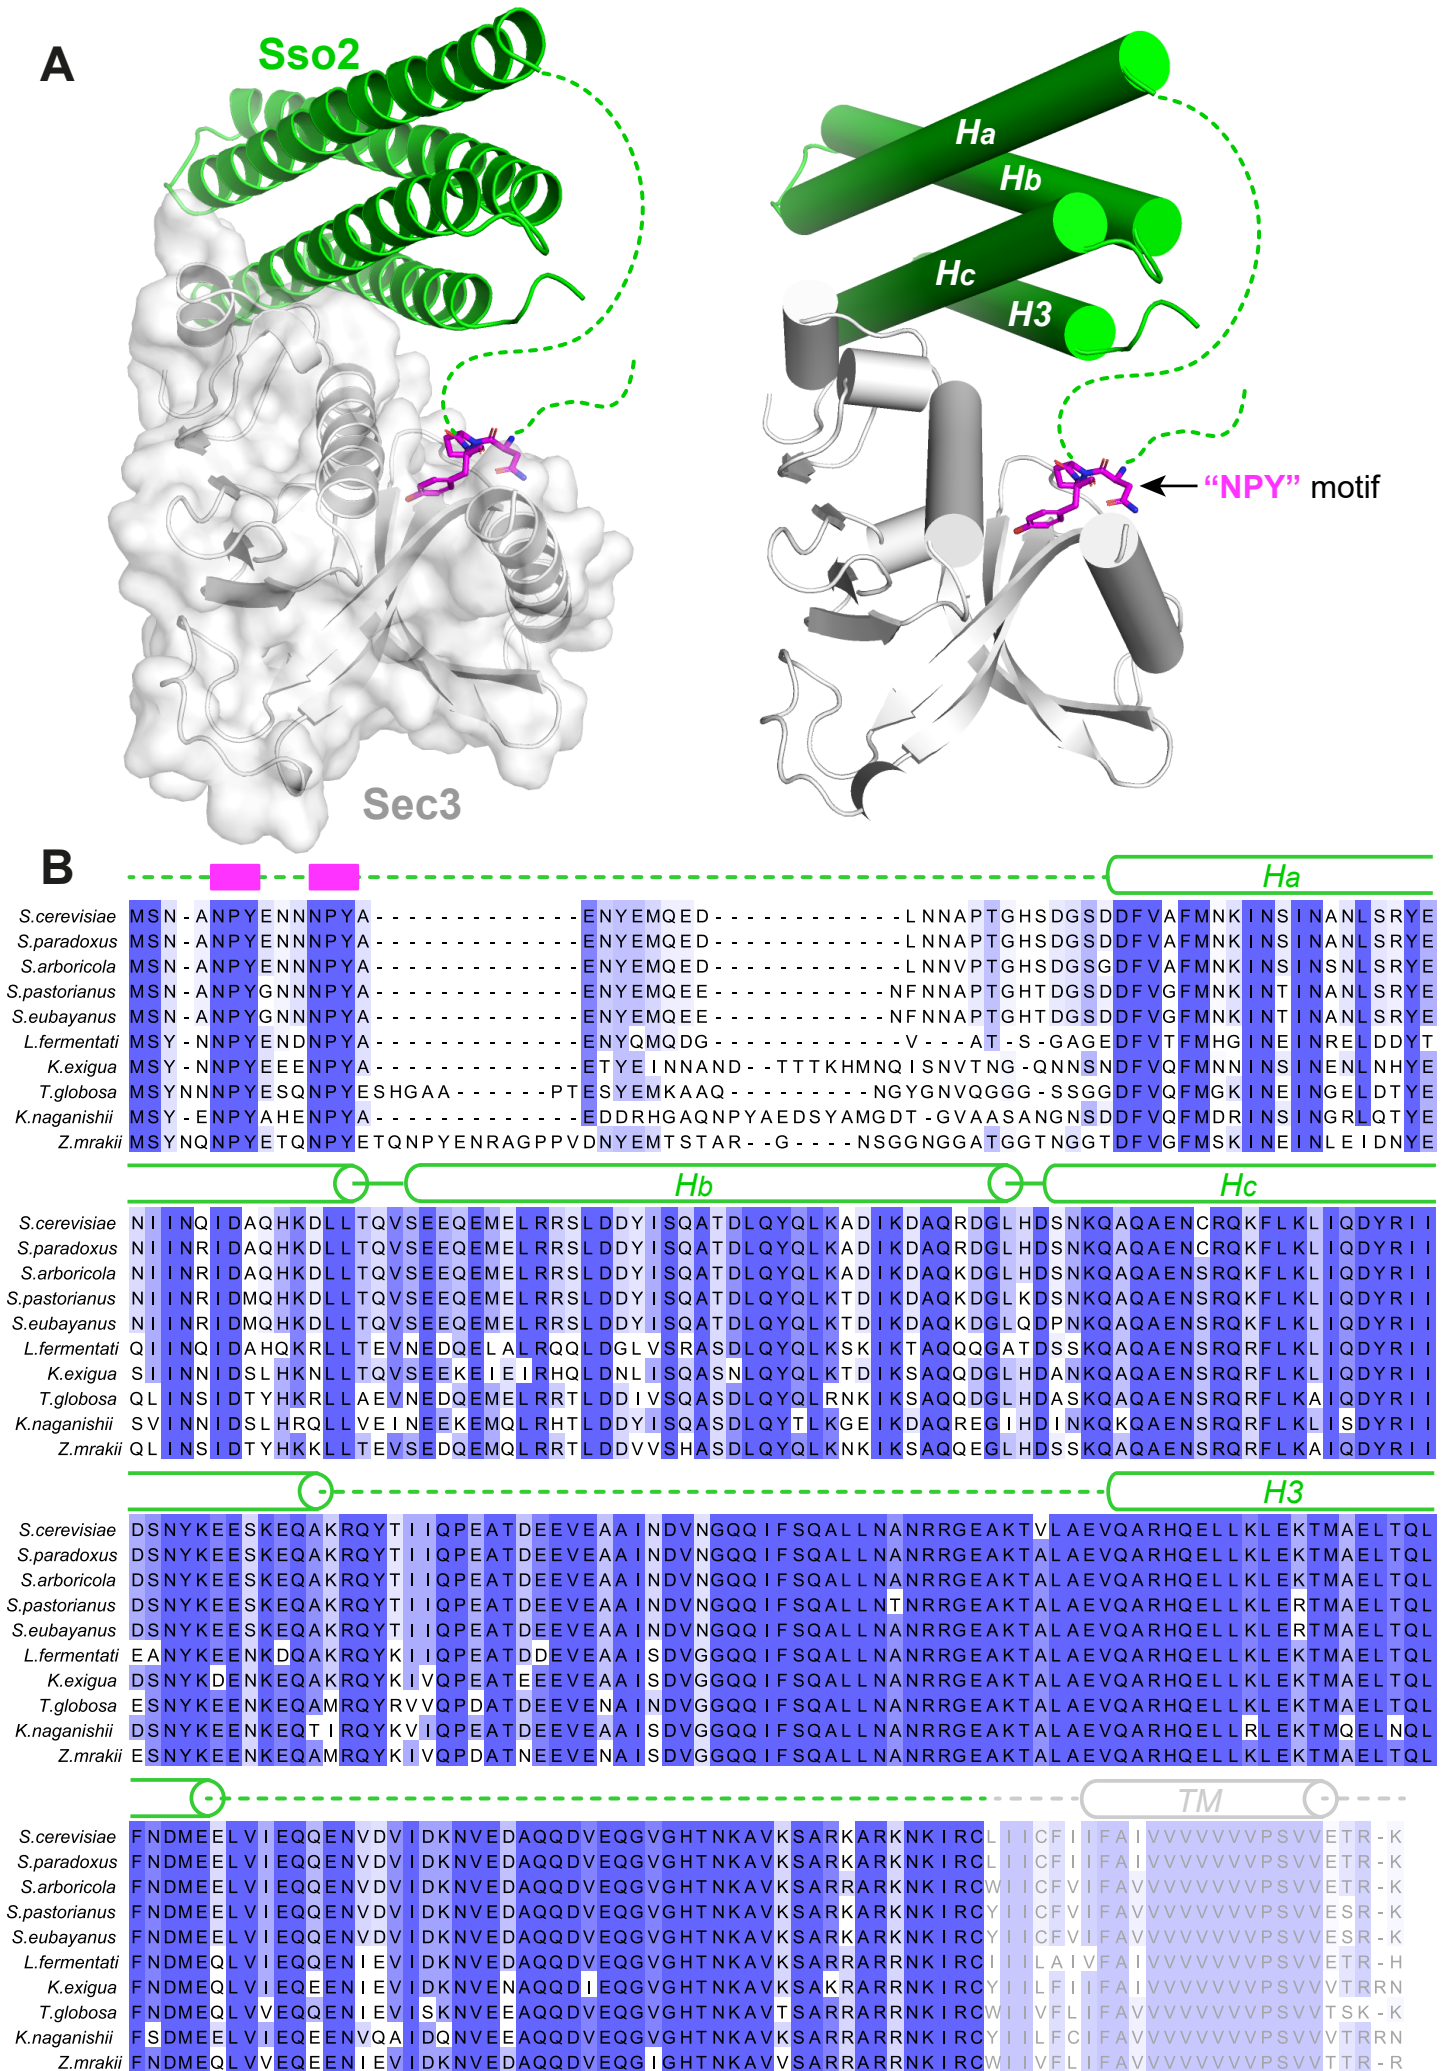

Supplement: supp [file elife-82041-supp-v1.zip › elife_poa_e82041_Figure_2_figure_supplement_1.pdf]

Figure 2-figure supplement 2

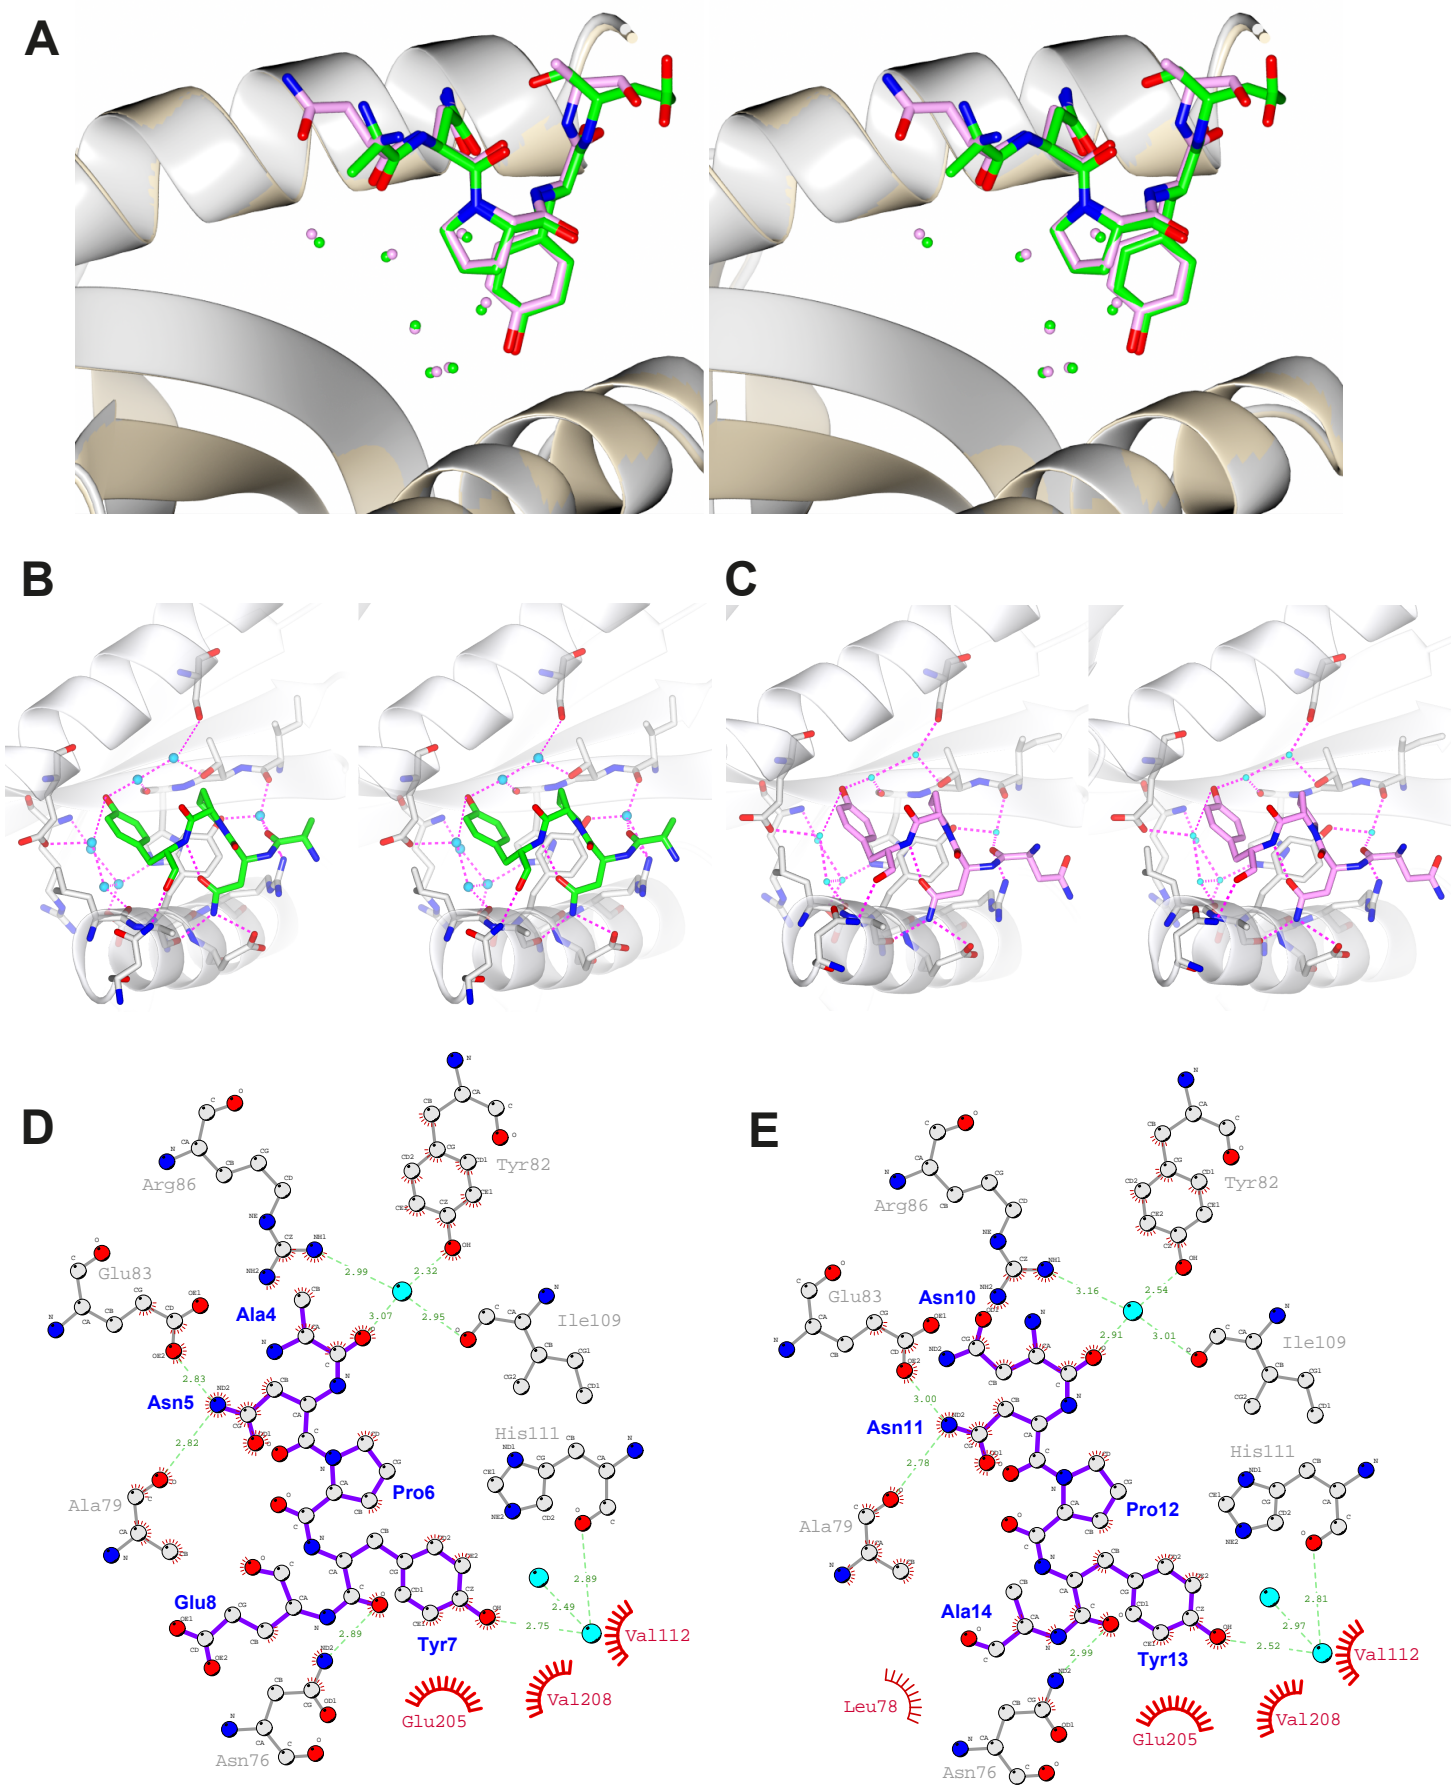

Supplement: supp [file elife-82041-supp-v1.zip › elife_poa_e82041_Figure_2_figure_supplement_2.pdf]

**Figure 8-figure supplement 1**

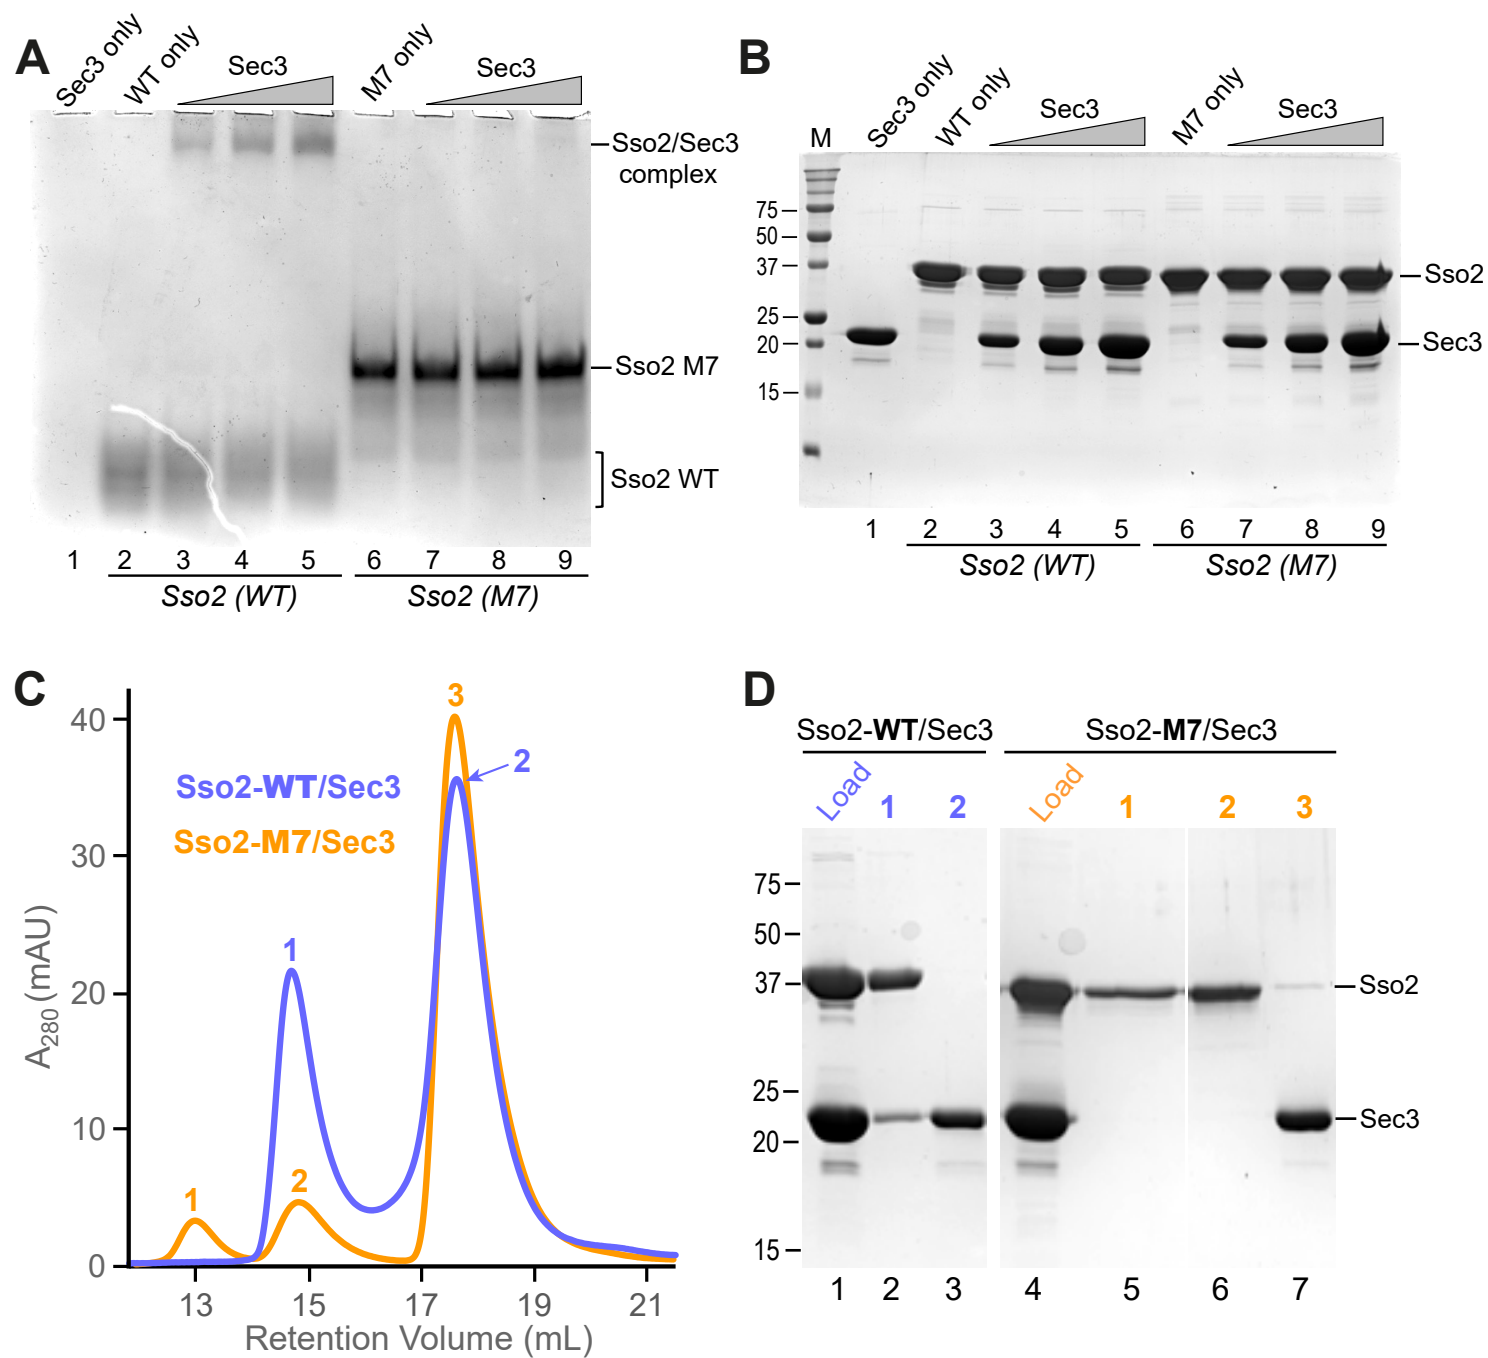

Supplement: supp [file elife-82041-supp-v1.zip › elife_poa_e82041_Figure_8_figure_supplement_1.pdf]

Figure 8-figure supplement 2

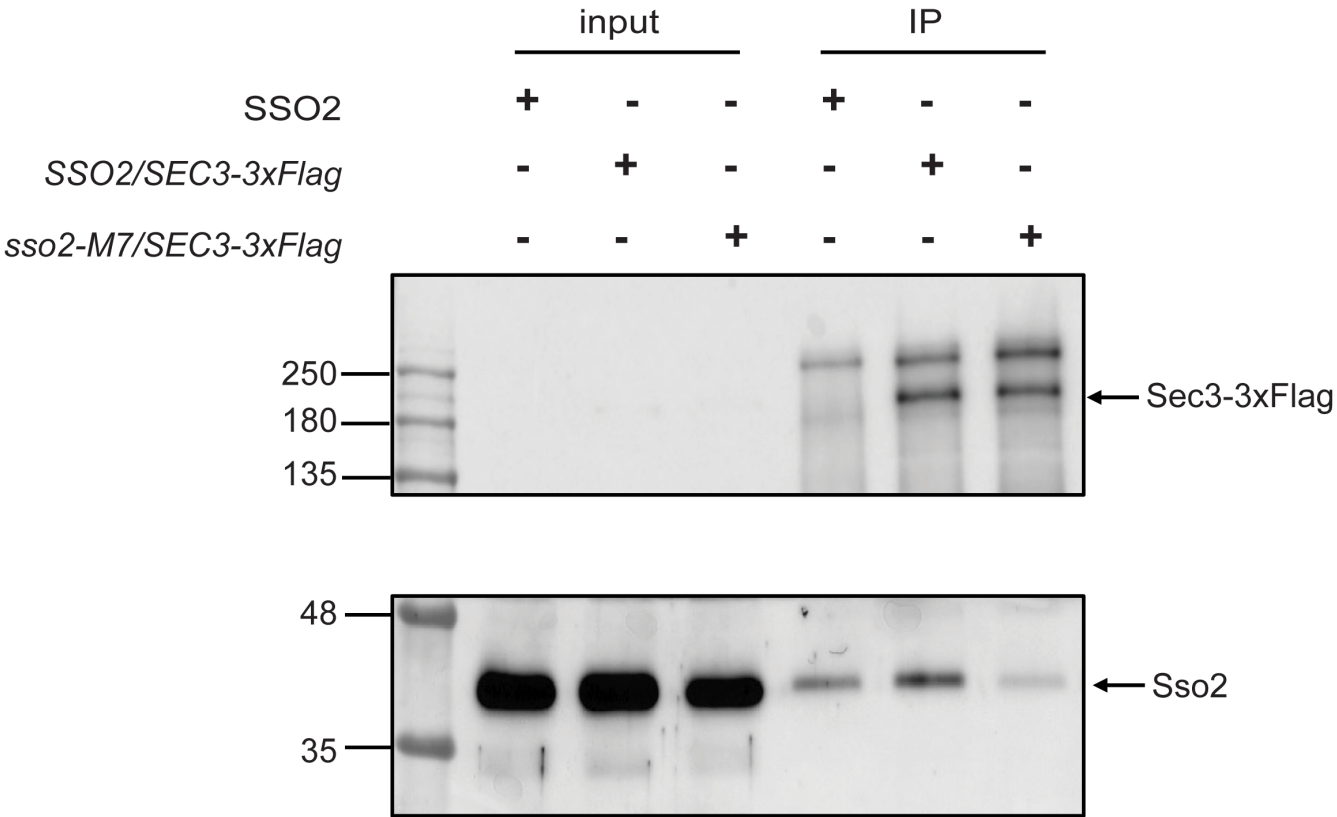

Supplement: supp [file elife-82041-supp-v1.zip › elife_poa_e82041_Figure_8_figure_supplement_2.pdf]

Figure 9-figure supplement 1

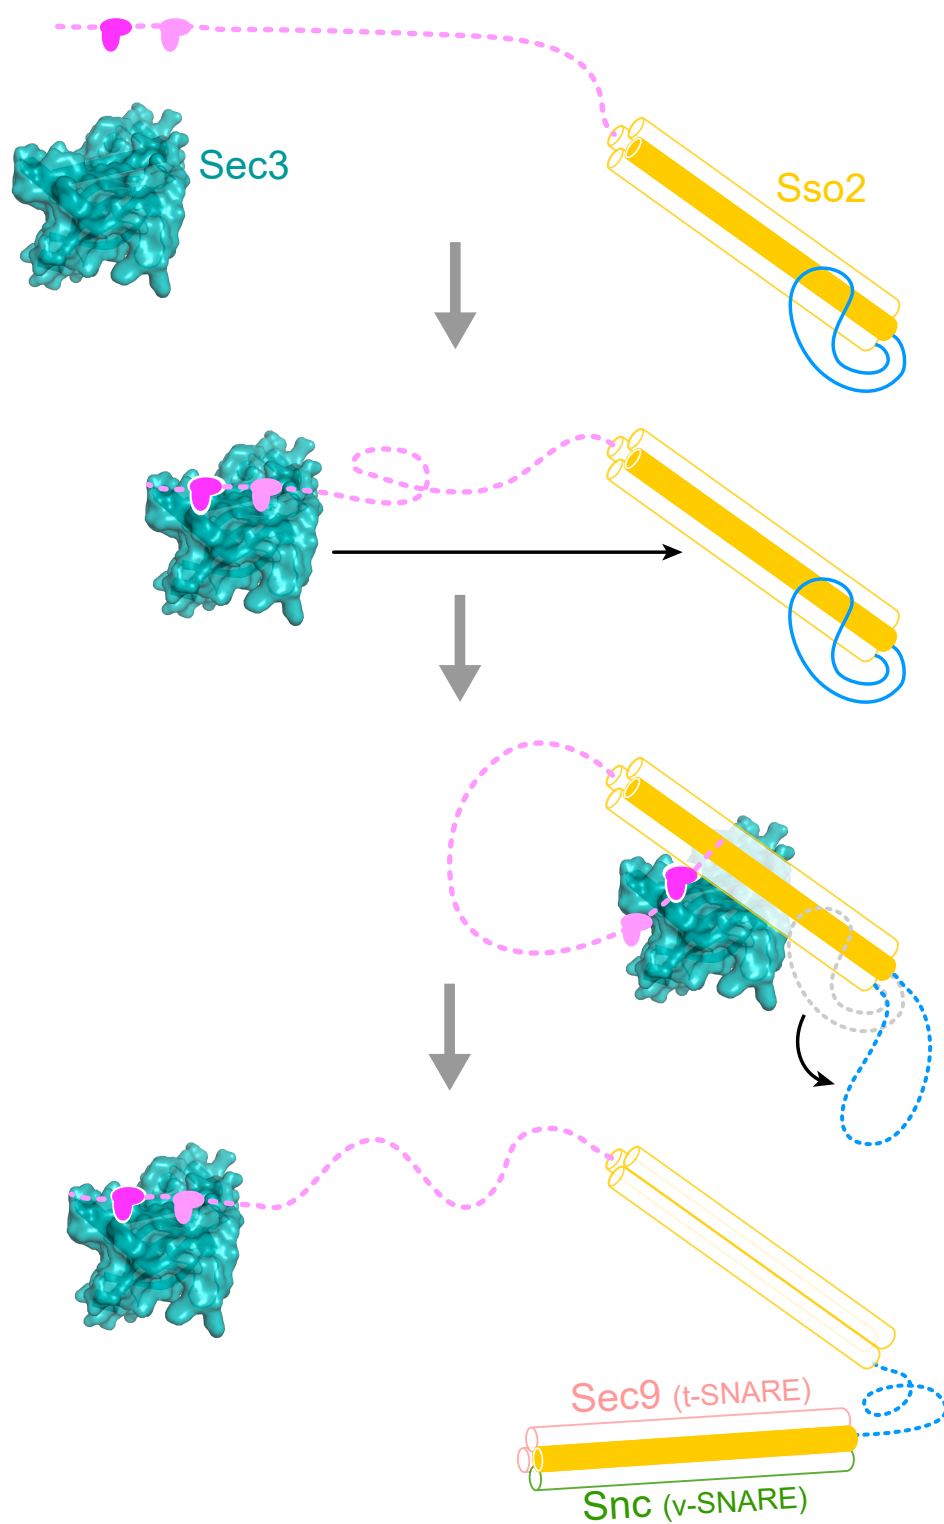

Supplement: supp [file elife-82041-supp-v1.zip › elife_poa_e82041_Figure_9_figure_supplement_1.pdf]
